# Supplementary material for: A novel water developable tetraphenyltin-based nonchemically-amplified molecular resist for sub-13 nm lithography
Source: Royal Society of Chemistry journal article supplement (doi:10.1039/d3lf00254c), 2024-01-01
Supplement: d3lf00254c1.pdf [file d3lf00254c1.pdf]

## Supporting Information

### **A Novel Water Developable Tetraphenyltin Based Nonchemically-Amplified Molecular Resist for Sub-13nm Lithography**

Zhihao Wang,<sup>a</sup> Jinping Chen,<sup>\*,a</sup> Tianjun Yu,<sup>a</sup> Yi Zeng,<sup>a</sup> Xudong Guo,<sup>b</sup> Shuangqing Wang,<sup>b</sup> Rui Hu,<sup>b</sup> Peng Tian,<sup>c</sup> Michaela Vockenhuber,<sup>c</sup> Dimitrios Kazazis,<sup>c</sup> Yasin Ekinci,<sup>c,\*</sup> Guoqiang Yang<sup>\*,b</sup> and Yi Li<sup>\*,a</sup>

<sup>a</sup>Key Laboratory of Photochemical Conversion and Optoelectronic Materials,  
Technical Institute of Physics and Chemistry, University of Chinese Academy of  
Sciences, Chinese Academy of Sciences, Beijing 100190, China. E-mail:  
chenjp@mail.ipc.ac.cn; yili@mail.ipc.ac.cn

<sup>b</sup>Key Laboratory of Photochemistry, Institute of Chemistry, University of Chinese  
Academy of Sciences, Chinese Academy of Sciences, Beijing 100190, China. E-mail:  
gqyang@iccas.ac.cn

<sup>c</sup>Paul Scherrer Institute, Laboratory for X-ray Nanoscience and Technologies, CH-  
5232 Villigen, Switzerland. yasin.ekinci@psi.ch

## **Table of Contents**

- 1. Synthesis and Characterization of SnMS<sub>4</sub> and SnMSF<sub>4</sub>**
- 2. Normalized remaining thickness (NRT) analysis**
- 3. EUV lithographic patterns with different exposure doses for SnMSF<sub>4</sub> resist**
- 4. LER measurement of high-resolution SEM images**
- 5. XPS test results for mechanism analysis**

## 1. Synthesis and Characterization of SnMS<sub>4</sub> and SnMSF<sub>4</sub>

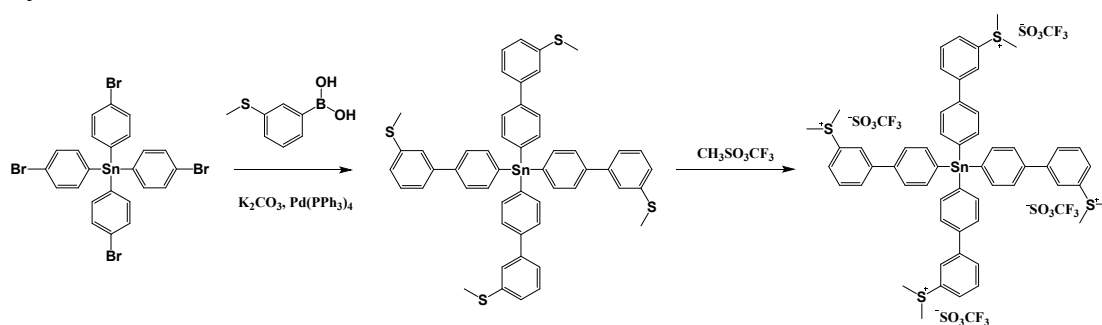

**Scheme S1** Synthesis of SnMSF<sub>4</sub>

**Chemicals and Reagents.** All the standard reagents and chemicals were purchased from commercial sources and used without any further purification. Sn(*p*-C<sub>6</sub>H<sub>4</sub>Br)<sub>4</sub> was synthesized according to the method reported in previous literature.<sup>1, 2</sup>

### **Synthesis of tetrakis(3'-(methylthio)-[1,1'-biphenyl]-4-yl)stannane (SnMS<sub>4</sub>).**

Sn(*p*-C<sub>6</sub>H<sub>4</sub>Br)<sub>4</sub> (4 g, 5.4 mmol), 3-methylthiophenylphenylboronic acid (5.44 g, 32.4 mmol), and anhydrous potassium carbonate (6.00 g, 43.4 mmol) were added to a 200 mL Schlenk flask, which was purged with argon and then charged with water (15 mL) and toluene (30 mL). Then tetratriphenylpalladium (0.40g, 0.35mmol) was added under a nitrogen atmosphere. The mixture was stirred at reflux overnight under a nitrogen atmosphere. The solution was cooled to room temperature and extracted with toluene/H<sub>2</sub>O three times. The combined organic layer was washed with brine, and dried over Mg<sub>2</sub>SO<sub>4</sub>. The solvent was removed under vacuum, and the crude product was purified by column chromatography on silica gel (petroleum ether/CH<sub>2</sub>Cl<sub>2</sub>=1:1, v/v) to give SnMS<sub>4</sub> as a white solid (0.96 g, 19 %). <sup>1</sup>H NMR (400 MHz, CD<sub>2</sub>Cl<sub>2</sub>) δ 7.76 (d, *J* = 8.1 Hz, 8H, benzene), 7.68 (d, *J* = 8.1 Hz, 8H, benzene), 7.51 (s, 4H, benzene), 7.43 – 7.35 (m, 8H, benzene), 7.30 – 7.22 (m, 4H, benzene), 2.53 (s, 12H, CH<sub>3</sub>). **Synthesis of (stannanetetrayltetrakis([1,1'-biphenyl]-4',3-diyl))tetrakis (dimethylsulfonium)**

**trifluoromethanesulfonate (SnMSF<sub>4</sub>).** SnMS<sub>4</sub> (0.24 g, 0.26 mmol) was added to a 250 mL round-bottomed flask with 120 mL dry CH<sub>2</sub>Cl<sub>2</sub>. Then methyl trifluoromethanesulfonate (0.52 g, 3.2 mmol) was added at room temperature. After stirring in the dark for 24 h, a large number of white solids were precipitated in the solution, which was filtered and washed with ether to give white solid of 0.38 g with a yield of 93%. <sup>1</sup>H NMR (400 MHz, CD<sub>3</sub>CN) δ 8.19 (s, 4H, benzene), 8.09 (d, *J* = 7.9 Hz, 4H, benzene), 7.99 – 7.76 (m, 24H, benzene), 3.21 (s, 24H, CH<sub>3</sub>). <sup>19</sup>F NMR (600 MHz, CD<sub>3</sub>CN) δ -79.29 (s, 1H). HRMS (ESI) *m/z*: [M]<sup>4+</sup> calcd for C<sub>56</sub>H<sub>56</sub>S<sub>4</sub>Sn<sup>4+</sup> 244.0566, found 244.0566; [M]<sup>-</sup> calcd for CF<sub>3</sub>SO<sub>3</sub><sup>-</sup> 148.9526, found 148.9525. FT-IR: ν<sub>max</sub>/cm<sup>-1</sup> 3061, 3024 and 2935 (CH), 1258 (CF<sub>3</sub>), 1161 and 640 (SO<sub>2</sub>), 1030 (S-O). Elemental analysis (%) calcd for C<sub>60</sub>H<sub>56</sub>F<sub>12</sub>O<sub>12</sub>S<sub>8</sub>Sn: C, 45.84; H, 3.59; S, 16.31; found: C, 46.64; H, 3.68; S, 16.06.

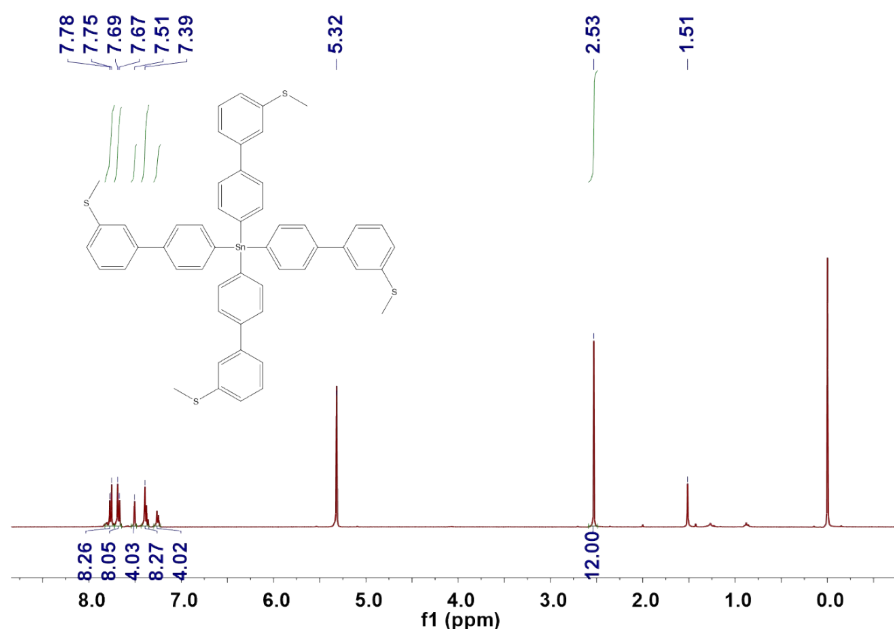

**Figure S1.** <sup>1</sup>H NMR (400 MHz, CD<sub>2</sub>Cl<sub>2</sub>) spectrum of SnMS.

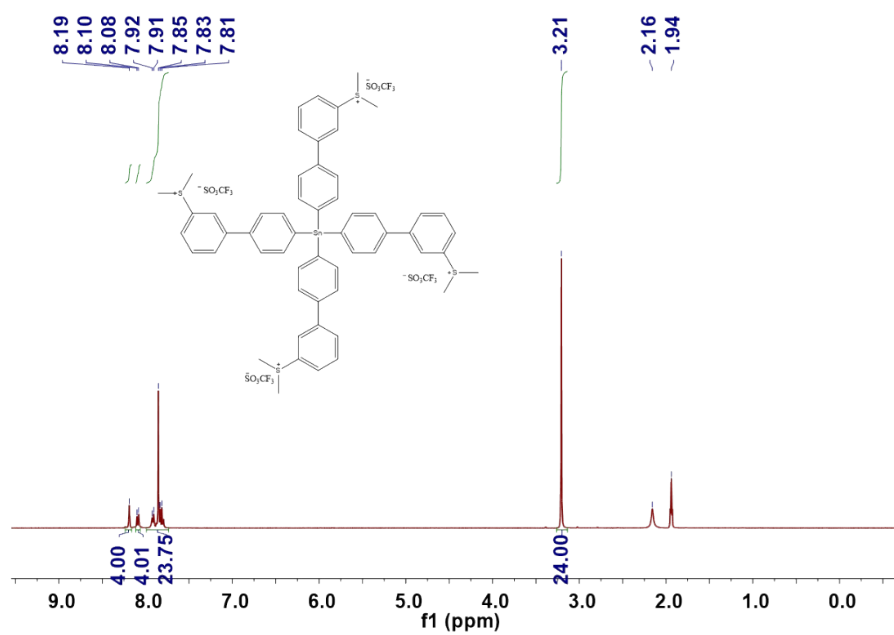

**Figure S2.**  $^1\text{H}$  NMR (400 MHz,  $\text{CD}_3\text{CN}$ ) spectrum of  $\text{SnMSF}_4$ .

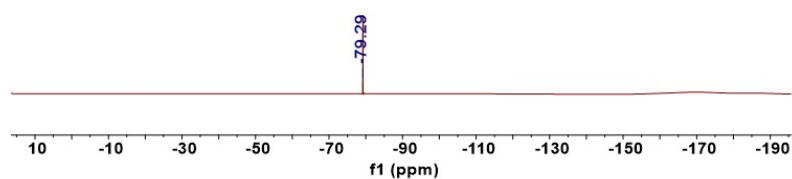

**Figure S3.**  $^{19}\text{F}$  NMR (400 MHz,  $\text{CD}_3\text{CN}$ ) spectrum of  $\text{SnMSF}_4$ .

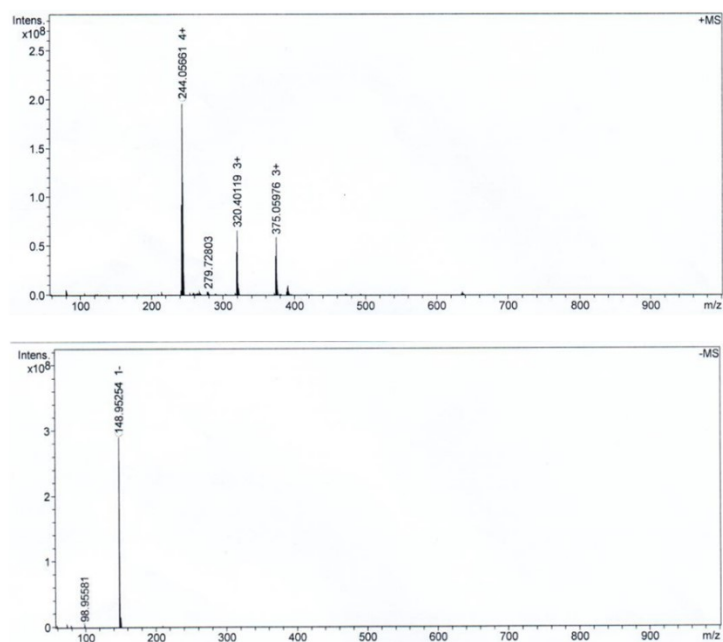

**Figure S4.** HRMS (ESI) spectrum of  $\text{SnMSF}_4$ .

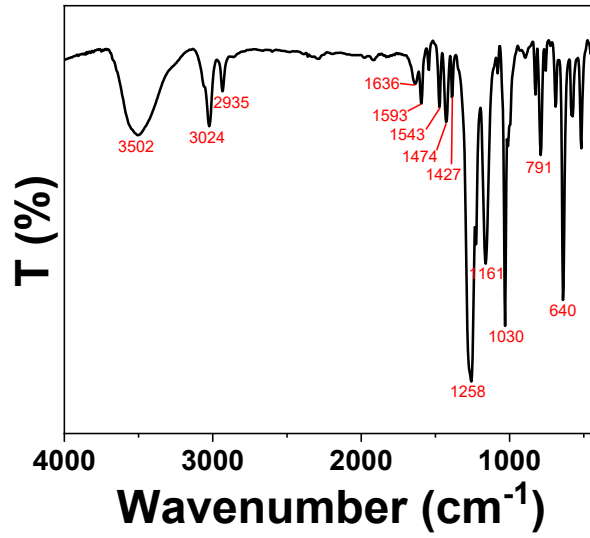

**Figure S5.** FT-IR spectrum of SnMSF<sub>4</sub>.

## 2. Normalized remaining thickness (NRT) analysis

The contrast curves were obtained by fitting the film thickness data using a logistic function. According to the contrast curve, the tangent line at  $y = 0.5$  can be obtained. The dose of tangent at  $y = 0$  and  $1$  are considered as  $D_0$  and  $D_{100}$ . The contrast could be calculated by the equation 1:

$$\gamma = \frac{1}{\log_{10}(D_{100}/D_0)} \quad (1)$$

## 3. EUV lithographic patterns with different exposure doses for SnMSF<sub>4</sub> resist

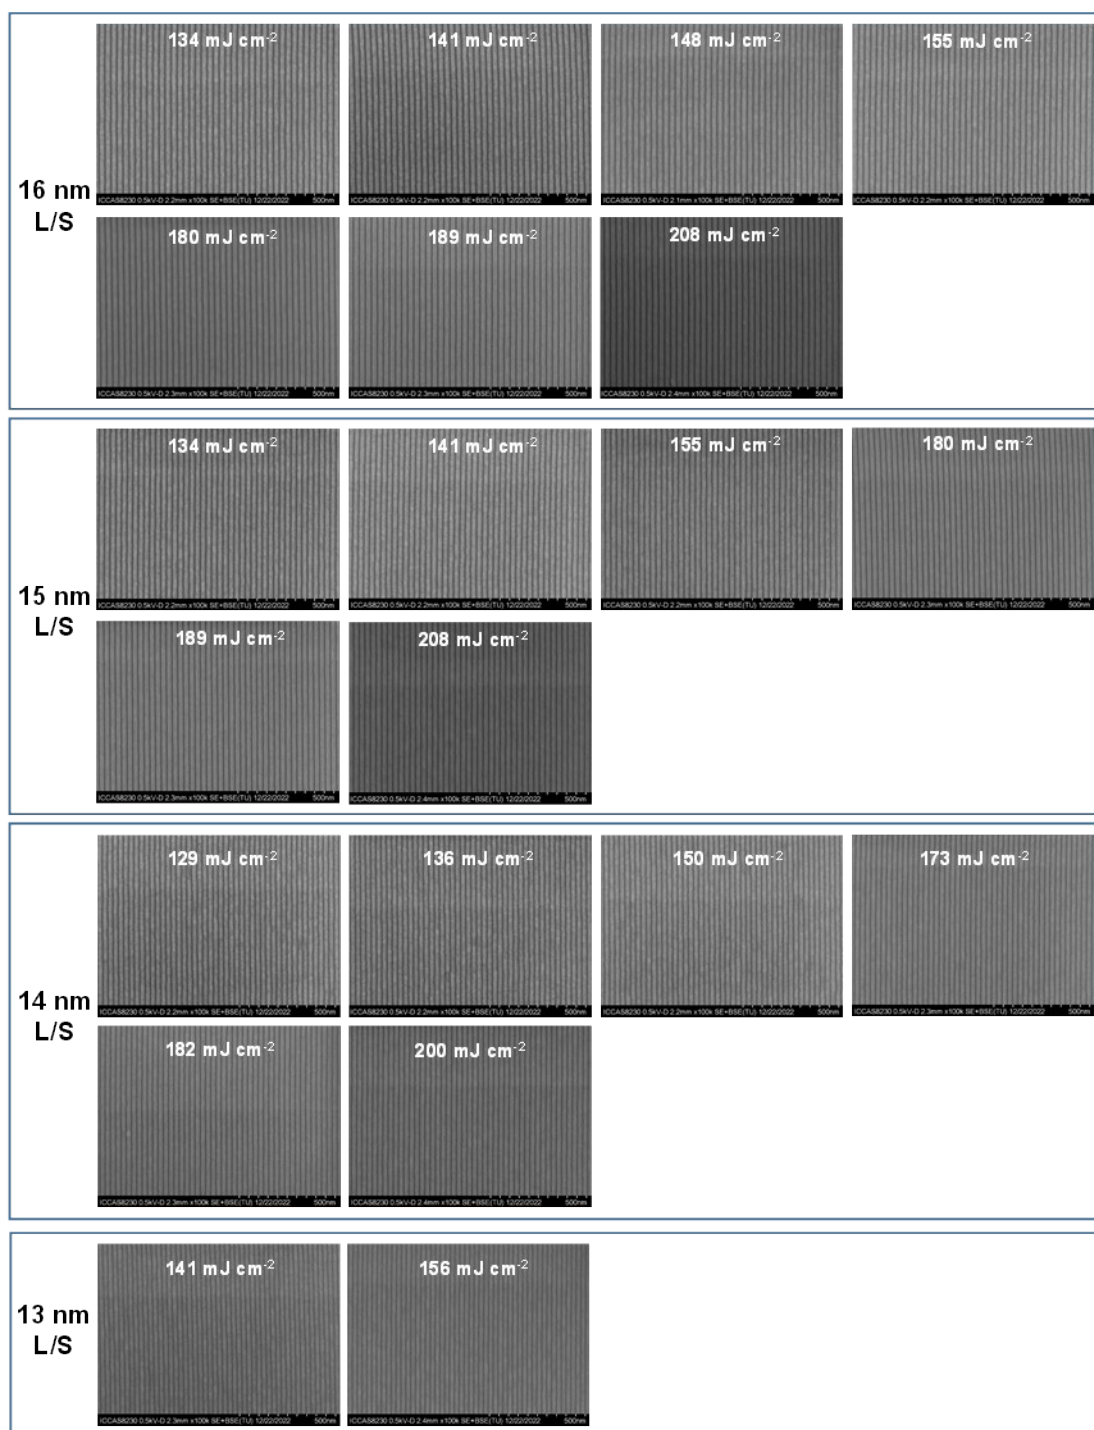

**Figure S6.** The 16, 15, 14 and 13 nm L/S line patterns of SnMSF<sub>4</sub> resist under different exposure doses for EUVL (Developer: H<sub>2</sub>O).

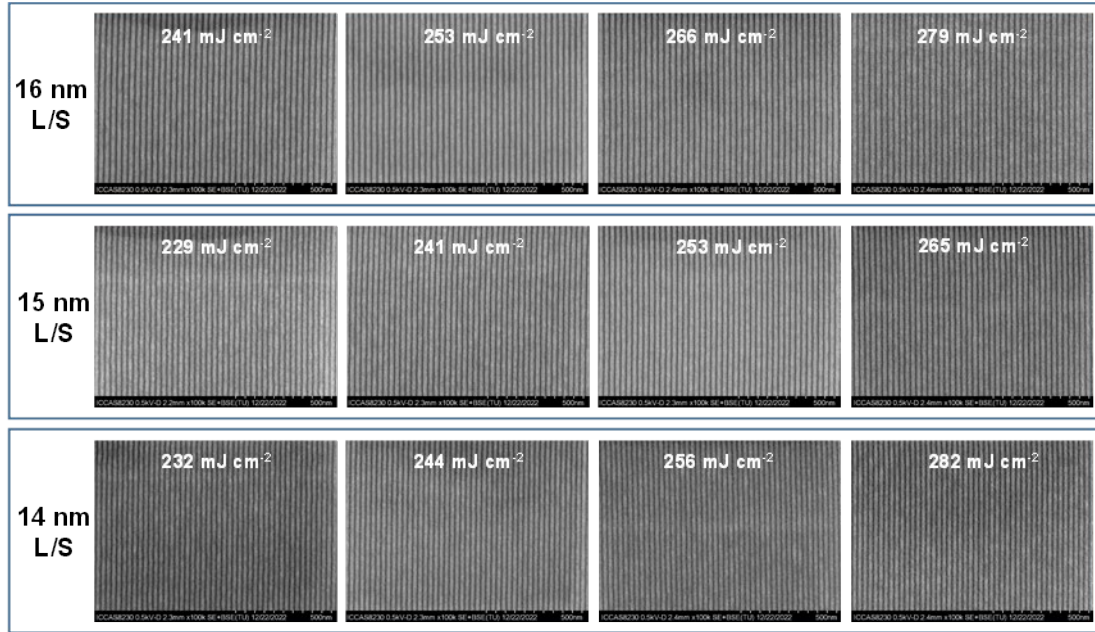

**Figure S7.** The 16, 15 and 14 nm L/S line patterns of SnMSF<sub>4</sub> resist under different exposure doses for EUVL (Developer: IPA/H<sub>2</sub>O=1/10).

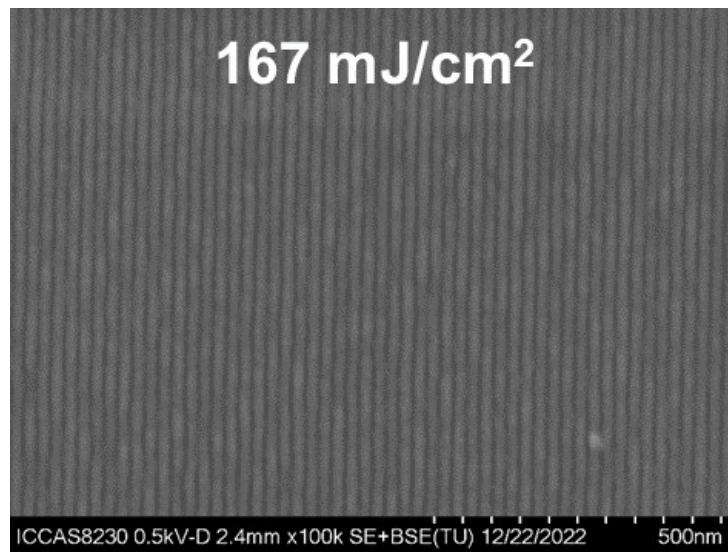

**Figure S8** The 12 nm L/S line patterns of SnMSF<sub>4</sub> resist for EUVL (Developer: H<sub>2</sub>O).

#### 4. LER measurement of high-resolution SEM images

The information on the SEM images was listed as following:

Data Size = 1280x960; Pixel Size=0.9921876; Signal Name=SE+BSE(TU);

Magnification = 100000

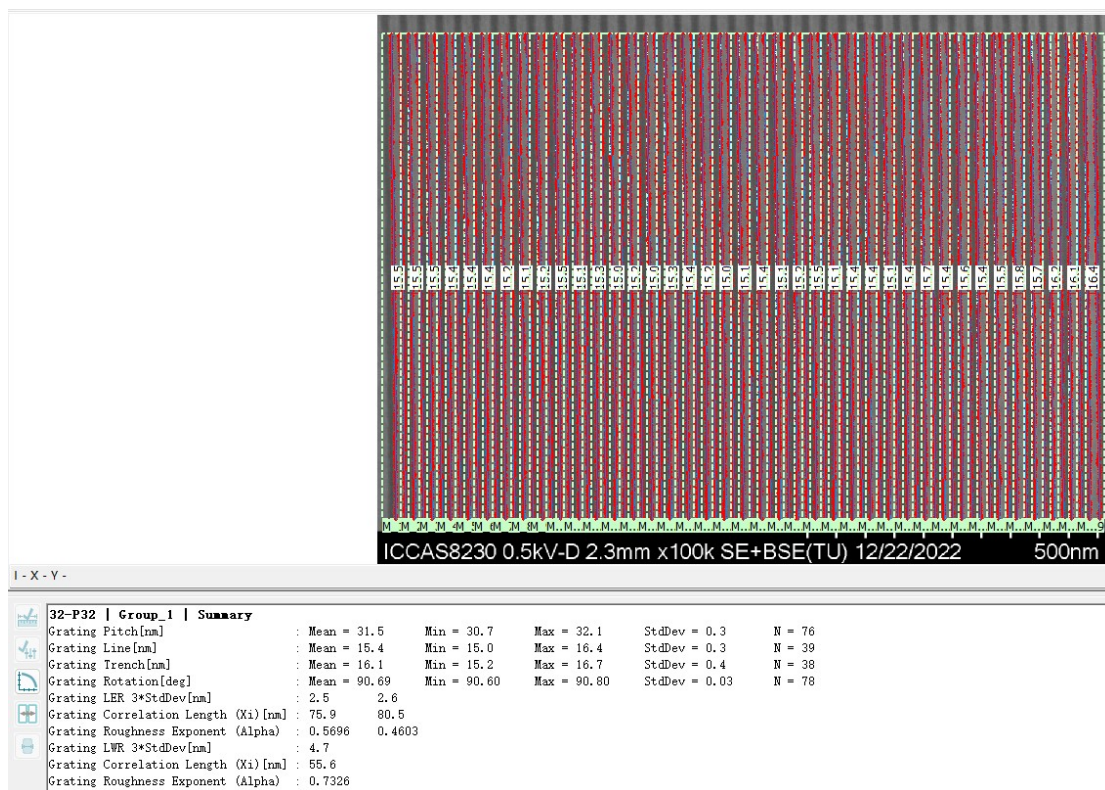

**Figure S9.** The LER and LWR measurement of 16 nm L/S pattern of SnMSF<sub>4</sub> resist (Developer: H<sub>2</sub>O).

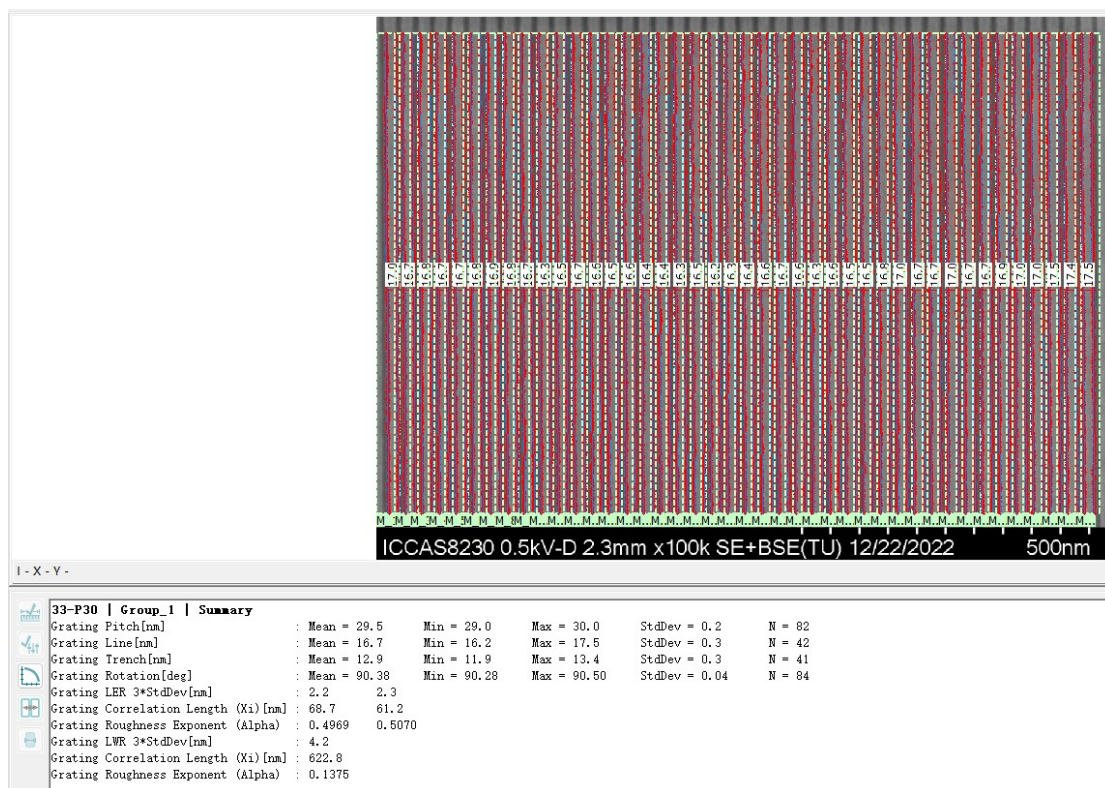

**Figure S10.** The LER and LWR measurement of 15 nm L/S pattern of SnMSF<sub>4</sub> resist (Developer: H<sub>2</sub>O).

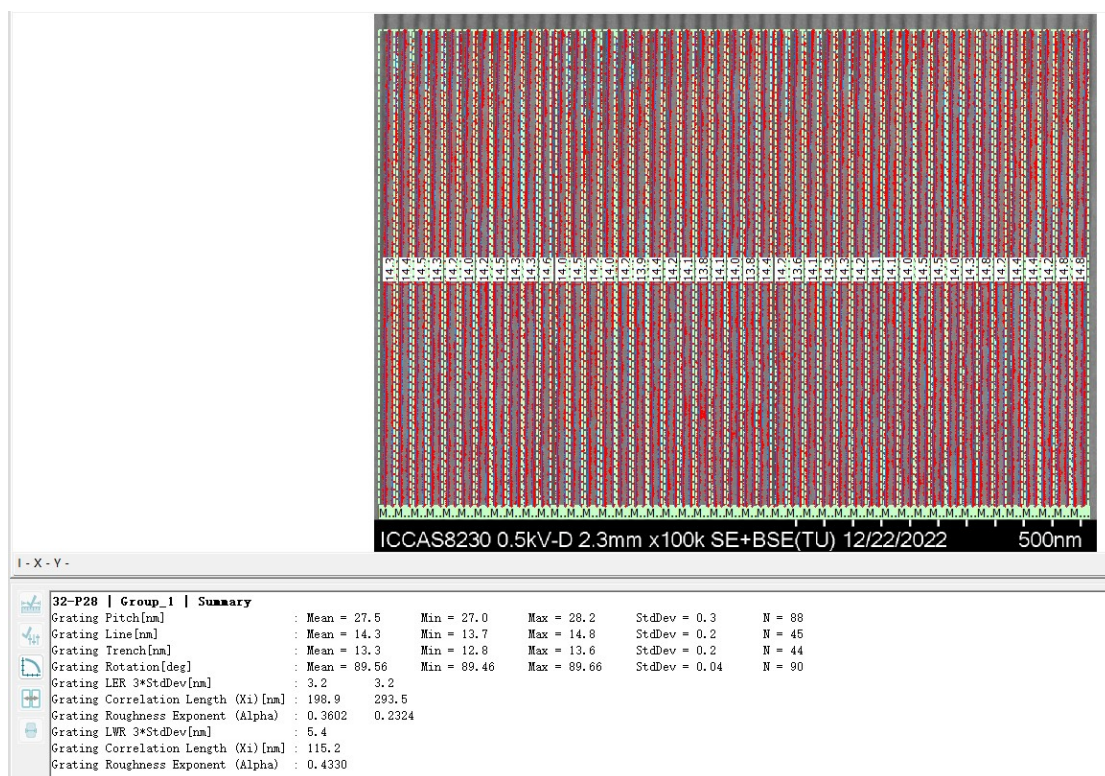

**Figure S11.** The LER and LWR measurement of 14 nm L/S pattern of SnMSF<sub>4</sub> resist (Developer: H<sub>2</sub>O).

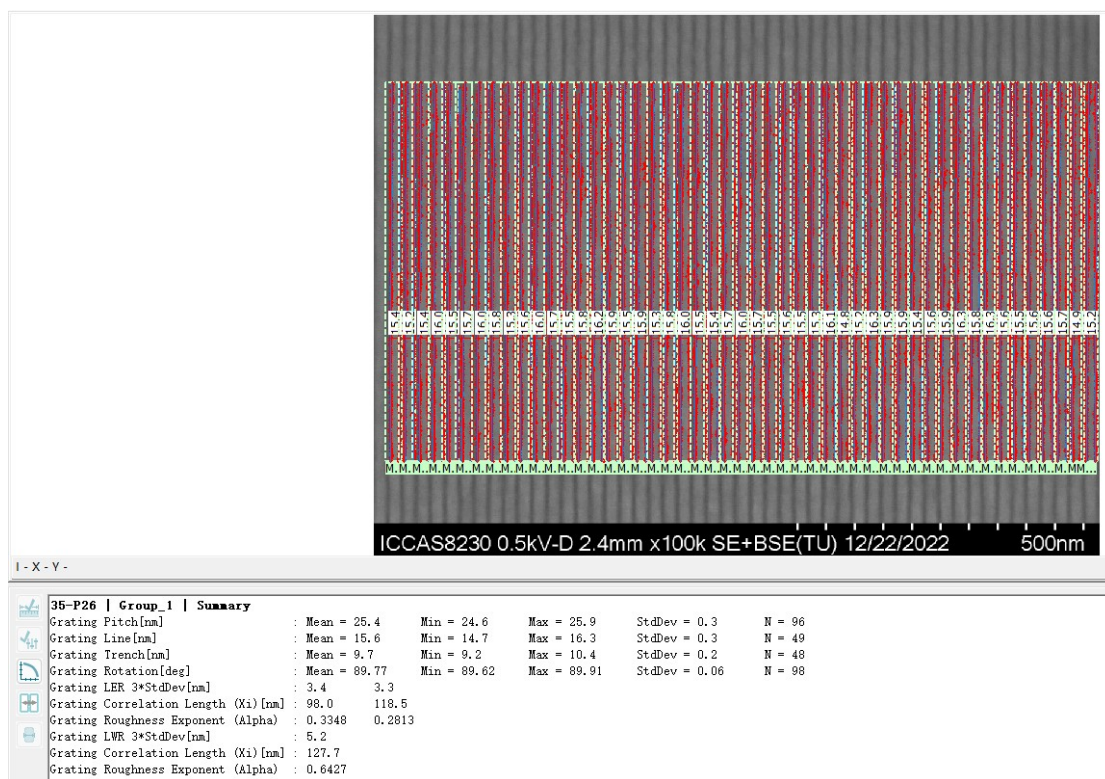

**Figure S12.** The LER and LWR measurement of 13 nm L/S pattern of SnMSF<sub>4</sub> resist (Developer: H<sub>2</sub>O).

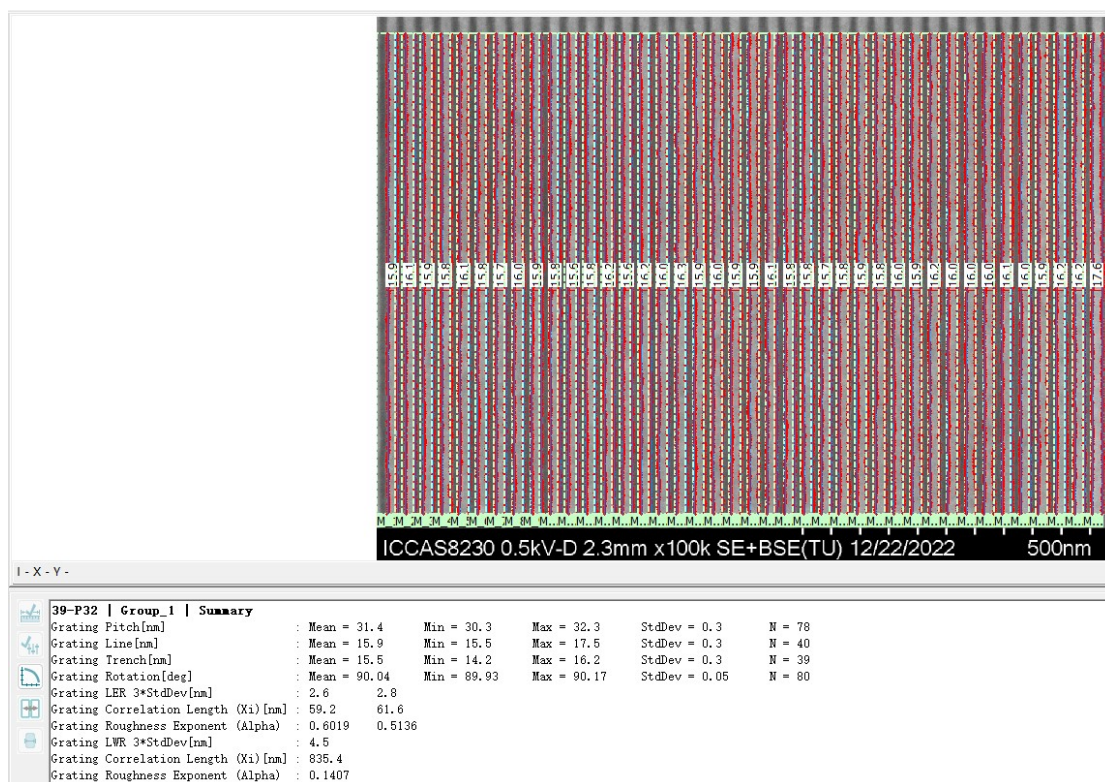

**Figure S13.** The LER and LWR measurement of 16 nm L/S pattern of SnMSF<sub>4</sub> resist (Developer: IPA/H<sub>2</sub>O=1/10).

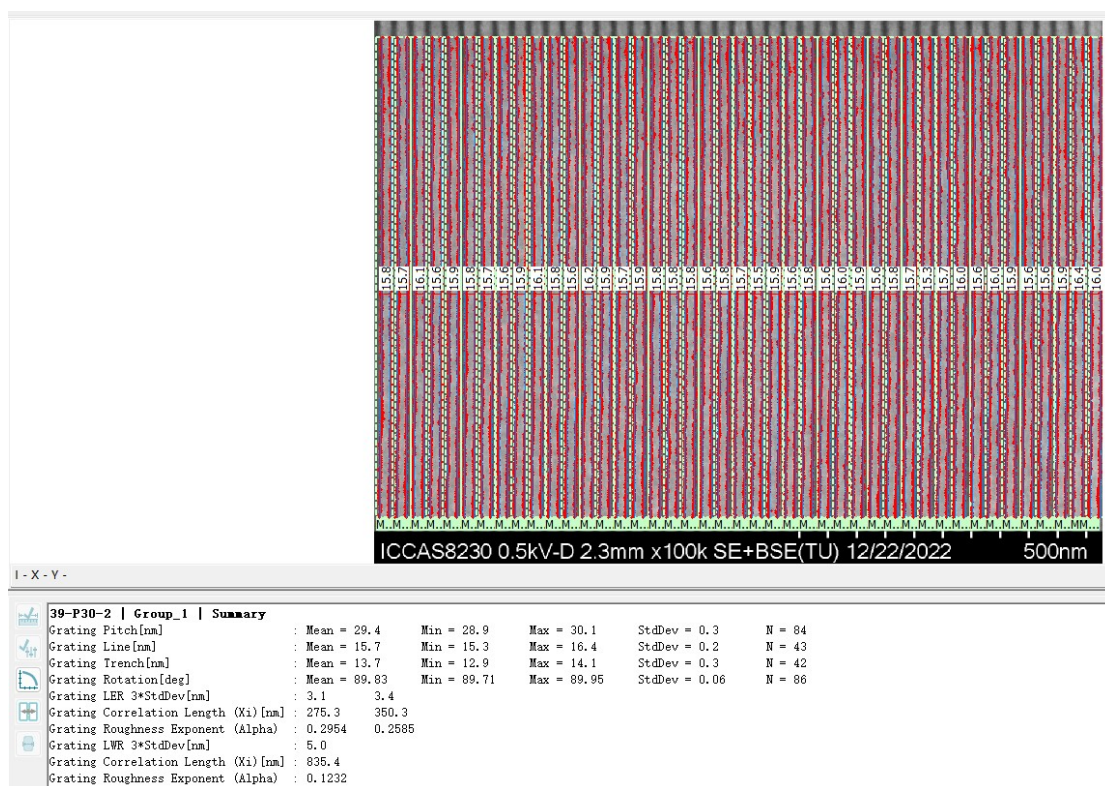

**Figure S14.** The LER and LWR measurement of 15 nm L/S pattern of SnMSF<sub>4</sub> resist (Developer: IPA/H<sub>2</sub>O=1/10).

## 5. XPS test results for mechanism analysis

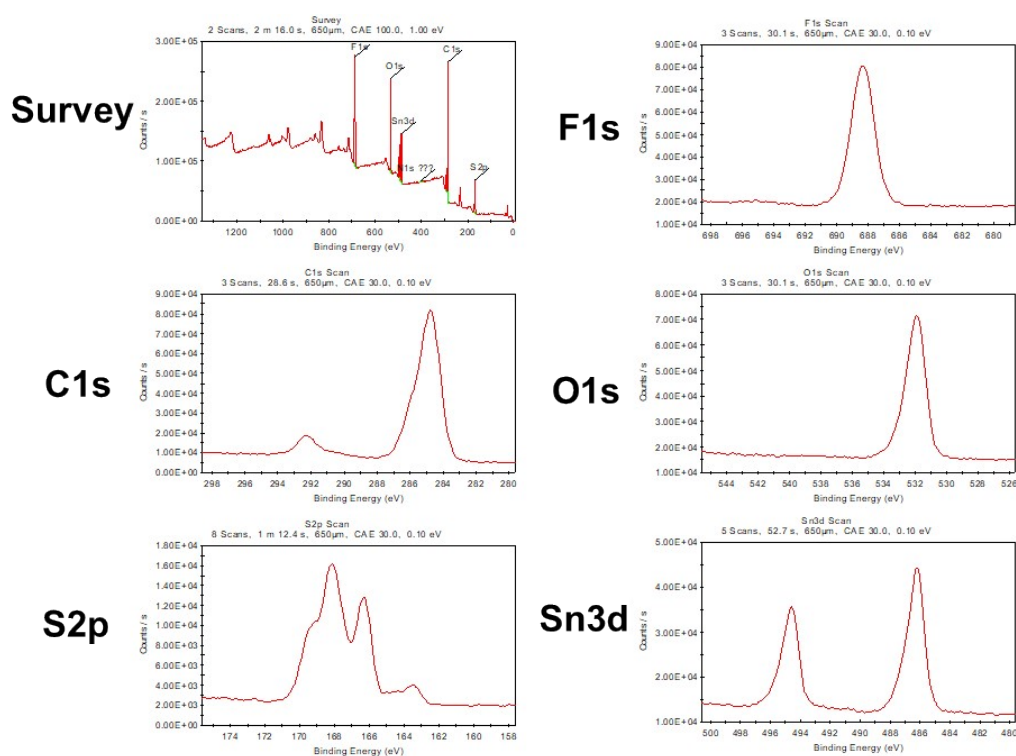

**Figure S15.** The XPS survey spectra and high-resolution XPS spectra of C 1s, S 2p, F 1s, O 1s and Sn 3d for the pristine film of SnMSF<sub>4</sub> resist.

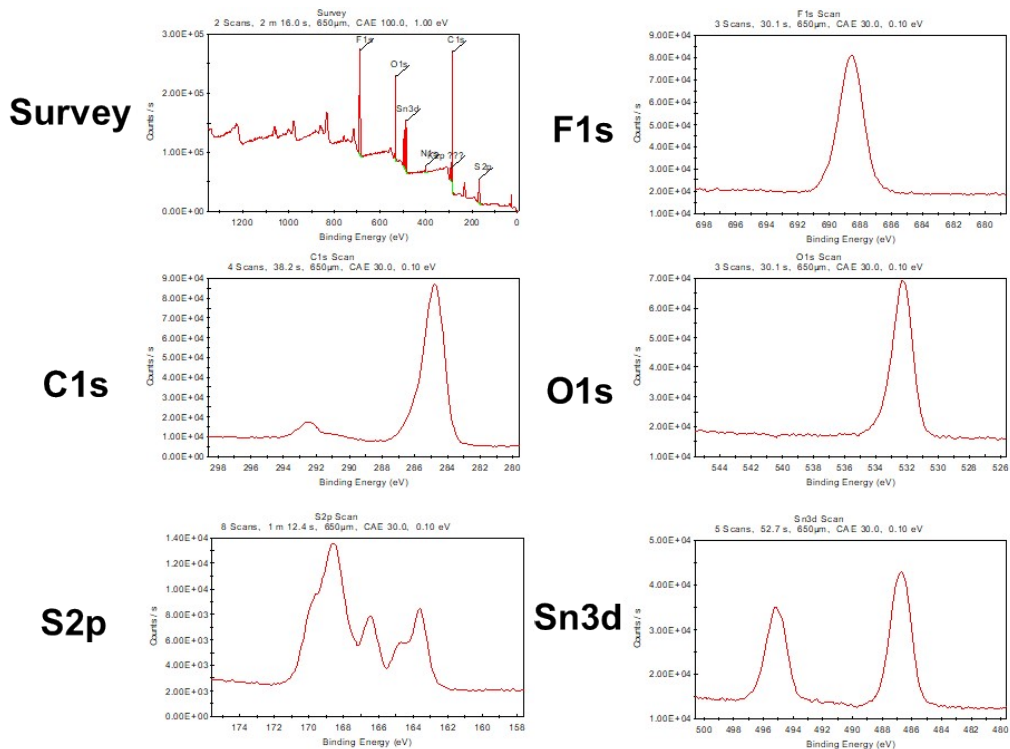

**Figure S16.** The XPS survey spectra and high-resolution XPS spectra of C 1s, S 2p, F 1s, O 1s and Sn 3d for the SnMSF<sub>4</sub> resist films after e-beam exposure.

1. Yang, Y.; Beele, B.; Bluemel, J., Easily immobilized di- and tetraphosphine linkers: Rigid scaffolds that prevent interactions of metal complexes with oxide supports. *Journal of the American Chemical Society* **2008**, *130* (12), 3771-3773.
2. Uptmoor, A. C.; Geyer, F. L.; Rominger, F.; Freudenberg, J.; Bunz, U. H. F., Tetrahedral Tetrakis(p-ethynylphenyl) Group IV Compounds in Microporous Polymers: Effect of Tetrel on Porosity. *Chempluschem* **2018**, *83* (5), 448-454.
